# Supplementary material for: Deferasirox-induced iron depletion promotes BclxL downregulation and death of proximal tubular cells
Source: PubMed Central journal article supplement (PMC5282523; doi:10.1038/srep41510), 2017-01-31

## **Deferasirox-induced iron depletion promotes BclxL downregulation and death of proximal tubular cells**

Diego Martin-Sanchez<sup>1-3</sup>, Angel Gallegos-Villalobos<sup>1-3</sup>, Miguel Fontecha-Barriuso<sup>1-3</sup>, Susana Carrasco<sup>1-3</sup>, Maria Dolores Sanchez-Niño<sup>1-3</sup>, Francisco J Lopez-Hernandez<sup>2-4</sup>, Marta Ruiz-Ortega<sup>1-3</sup>, Jesus Egido<sup>1,2</sup>, Alberto Ortiz<sup>1-3</sup>, Ana Belén Sanz<sup>1-3</sup>.

### Supplementary figure 1

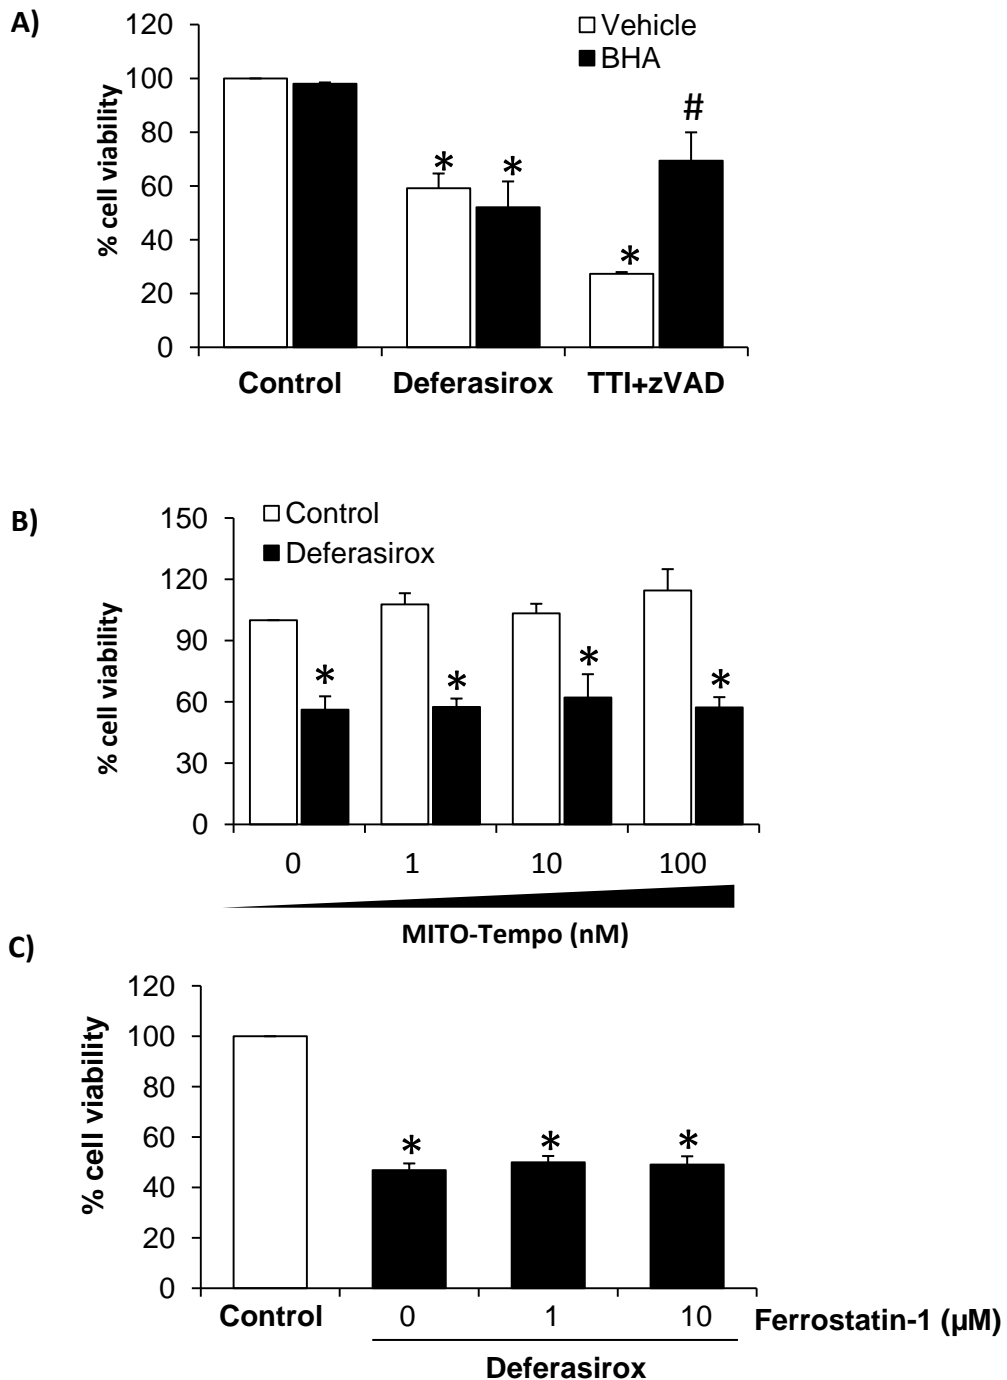

**Supplementary figure 1. Antioxidants or ferrostatin-1 did not prevent deferasirox-induced cell death in tubular cells.** Tubular cells were treated with butylated hydroxyanisole (BHA) at 100 μM (A), with Mito-TEMPO at different concentrations (B), or with Ferrostatin-1 at different concentrations (C), for 1 hour and then they were incubated with 10 μM deferasirox for 24 hours. Cell death was assessed by MTT assay. The cytokine cocktail 100 ng/ml TWEAK/30 ng/ml TNFα/ 30 U/ml interferon-γ (TTI)+zVAD was used as a positive control for BHA protection [13]. Mean ± SEM of three independent experiments. \*p<0.02 vs control; #p<0.04 vs TTI+zVAD.

Supplementary Figure 3. Image of uncropped blots

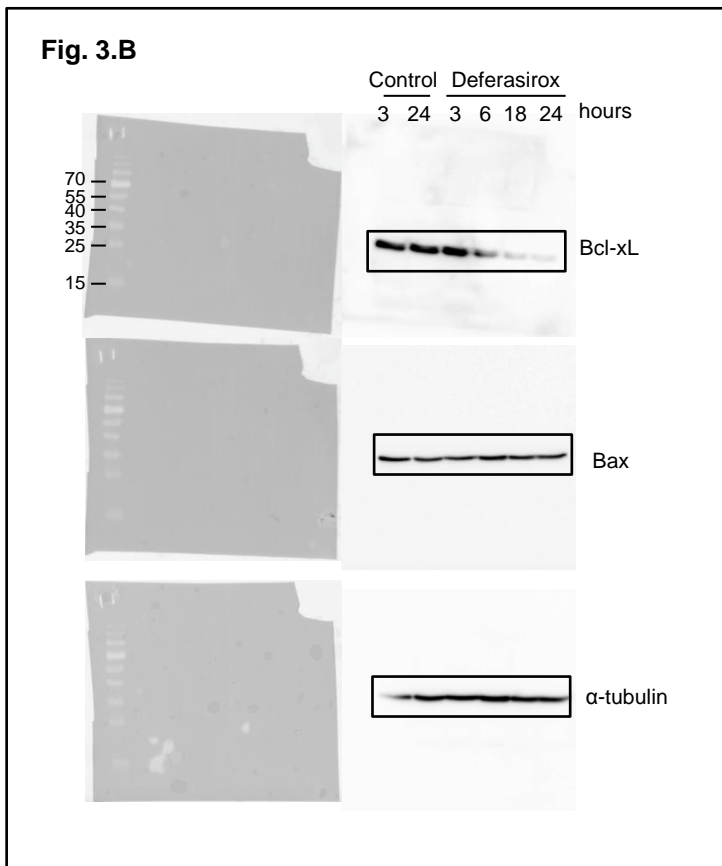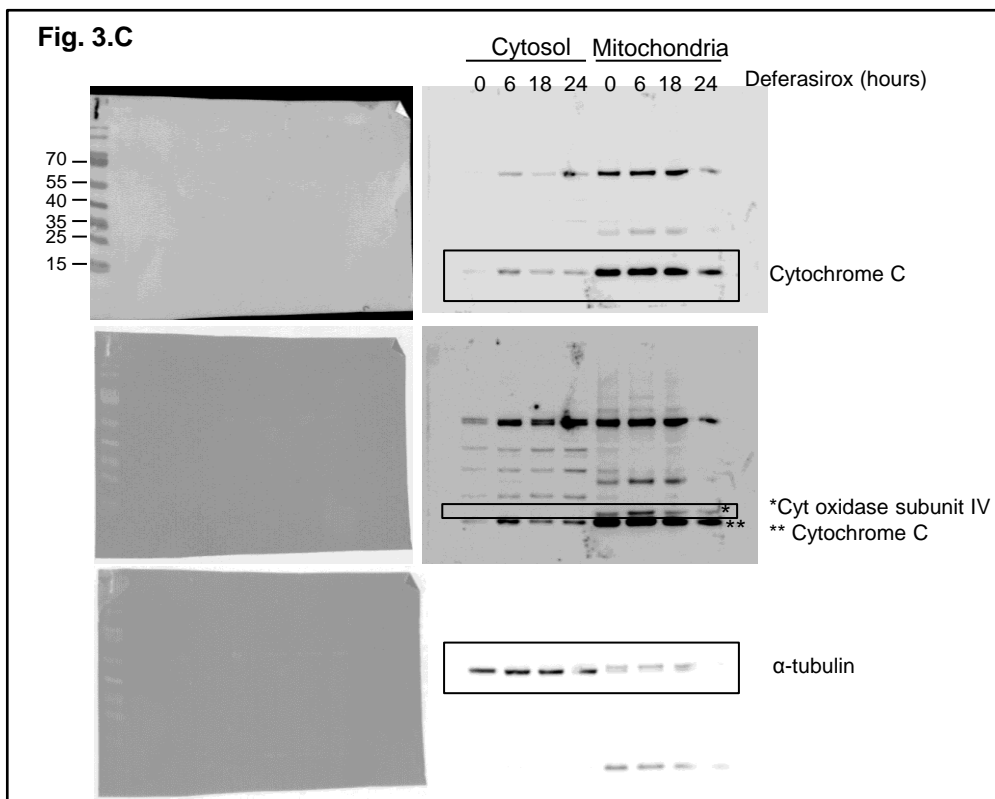

Supplementary Figure 4. Image of uncropped blots part II

Fig. 5.C

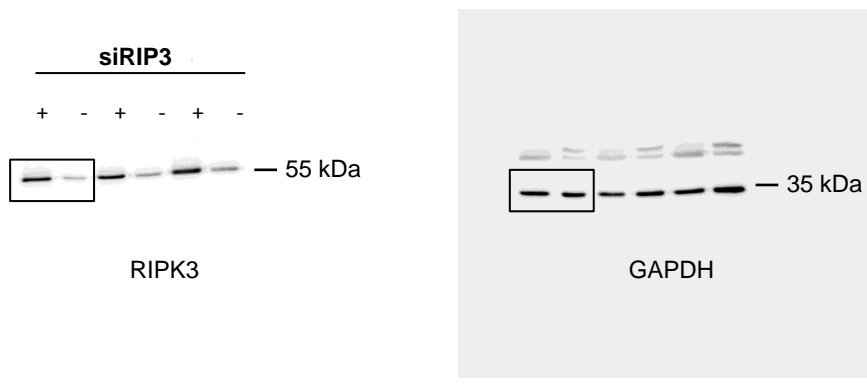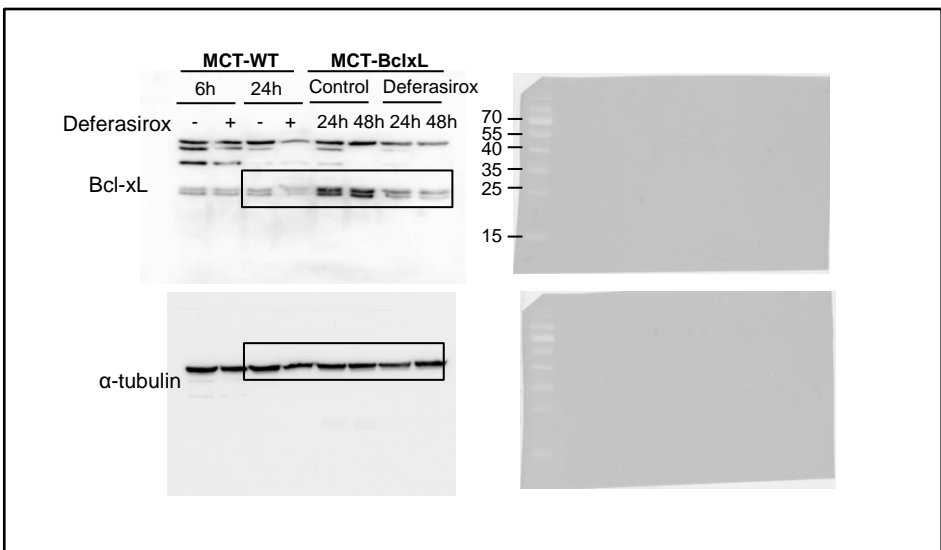

Fig. 8.D

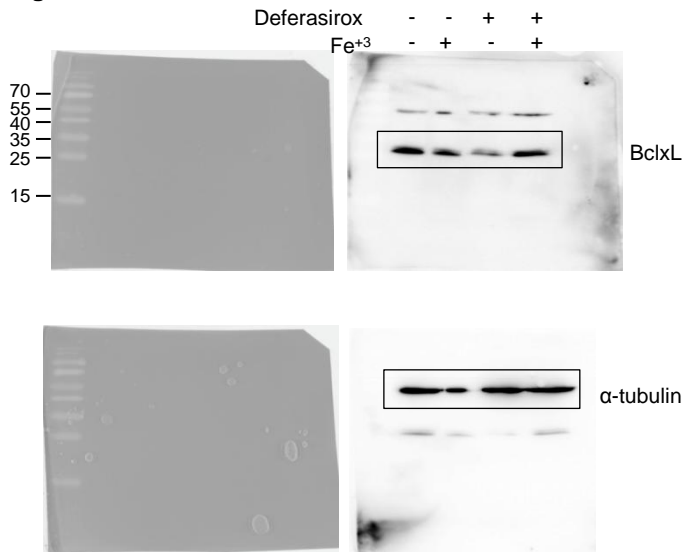

Supplement: srep41510-s1.pdf [file srep41510-s1.pdf]
